# Supplementary material for: Revealing the primary role of the V4+/V5+ cycle in InVO4 catalysts for promoting the photo-Fenton reaction
Source: Royal Society of Chemistry journal article supplement (doi:10.1039/d3en00776f), 2023-12-29
Supplement: d3en00776f1.pdf [file d3en00776f1.pdf]

## Supporting Information

### Revealing the primary role of $V^{4+}/V^{5+}$ cycle in $InVO_4$ catalyst for promoting photo-Fenton reaction

Lei Jin,<sup>a</sup> Honglin Liu,<sup>a</sup> Liqun Ye,<sup>a</sup> Yingping Huang,<sup>a</sup> Xiang Liu<sup>a\*</sup> and Di Huang<sup>a\*</sup>

<sup>a</sup>Engineering Research Center of Eco-Environment in Three Gorges Reservoir Region of Ministry of Education, College of Hydraulic & Environmental Engineering, College of Materials and Chemical Engineering, China Three Gorges University, Yichang, Hubei 443002, China. Email: [xiang.liu@ctgu.edu.cn](mailto:xiang.liu@ctgu.edu.cn) (X. Liu) and [huangd94@iccas.ac.cn](mailto:huangd94@iccas.ac.cn) (D. Huang)

### Table of Content

|                                                                                 |    |
|---------------------------------------------------------------------------------|----|
| 1. Materials.....                                                               | S2 |
| 2. Experimental.....                                                            | S2 |
| 3. Characterization.....                                                        | S3 |
| 4. Photocurrent and light absorption properties of $InVO_4$ .....               | S4 |
| 5. Identification of surface defects of $InVO_4$ .....                          | S5 |
| 6. $H_2O_2$ activation by $InVO_4$ photocatalysts.....                          | S5 |
| 7. Adjusted surface defects by surfactants.....                                 | S6 |
| 8. Physical characterization of nanocatalysts (Fig S1-S11 and Table S1-S4)..... | S7 |

## 1. Materials

N-Hexadecyltrimethylammonium Chloride (CTAC), Bromohexadecyl pyridine (CPB), indium nitrate hydrate ( $\text{In}(\text{NO}_3)_3 \cdot 4.5 \text{H}_2\text{O}$ ), ammonium vanadate ( $\text{NH}_4\text{VO}_3$ ), absolute ethanol ( $\text{CH}_3\text{CH}_2\text{OH}$ ), rhodamine B (RhB), microcystin-LR (MC-LR), hydrogen peroxide ( $\text{H}_2\text{O}_2$ ), isopropyl alcohol (IPA), benzoquinone (BQ), ethylenediaminetetraacetic acid (EDTA), all these reagents used in this study were analytical grade. Distilled water was used throughout the experiments.

## 2. Experimental

### 2.1 Preparation of $\text{InVO}_4$ in the presence of surfactant modification

$\text{InVO}_4$  was prepared by a hydrothermal method. Primarily, 2.5 mmol ( $\text{In}(\text{NO}_3)_3 \cdot 4.5 \text{H}_2\text{O}$ ) had been dissolved in water (20 mL) as solution A. 2.5 mmol  $\text{NH}_4\text{VO}_3$  had been dissolved in water (20 mL) at 60 °C as solution B, and 2.5 mmol of a surfactant (CTAC, CPB) was dissolved in 40 mL water as solution C. Then, solution A and B had been added slowly into solution C with intensively stirring, adding ammonia slowly to the mixture to tune the pH of the solution to (9 ~ 10) with yellow precipitate formed. Stir for another 60 min, the mixture had been transferred into a Teflon-lined stainless autoclave (150 mL) and heated for 24 h at 180 °C. The product was dried, and a black powder was collected. The powder was calcined at 600 °C for 10 h. The  $\text{InVO}_4$  samples prepared with CTAC, CPB were labeled as C- $\text{InVO}_4$  and B- $\text{InVO}_4$ . For comparison, a sample, N- $\text{InVO}_4$ , was also prepared by the same procedures without surfactant.

### 2.2 Performance evaluation of $\text{InVO}_4$ photocatalysts

Photocatalytic degradation of RhB ( $1.5 \times 10^{-5}$  M, 50 mL) or MC-LR ( $5 \times 10^{-6}$  M, 4 mL) with  $\text{H}_2\text{O}_2$  (0.045 M) under visible light was examined at room temperature in the air with an XPA-7 photocatalytic reactor. The reaction tubes were under a 400 W Xe lamp with two cutoff filters ( $420 \text{ nm} < \lambda < 760 \text{ nm}$ ). The distance of reaction tubes and light source was 10 cm. The suspension had been stirred magnetically in the dark for 2 h before irradiation to ensure adsorption saturation in the reaction system. The reactant solution was kept at room temperature by flowing cool water. During the irradiation, the suspension was sampled and centrifuged at a regular interval. The RhB concentration was tested by UV-vis spectrophotometer (Perkin Elmer, USA).

The removal rate ( $\eta\%$ ) of RhB was calculated as follows:

$$\eta\% = (C_0 - C_t / C_0) \times 100\% \quad (2)$$

where  $C_0$  was the RhB adsorption equilibrium concentration,  $C_t$  was the RhB concentration at the corresponding reaction time  $t$ .

The 400  $\mu\text{L}$  of the MC-LR suspension was sampled at a regular interval, centrifuged at 10000 rpm/min for 30 min, and filtered by 0.45  $\mu\text{m}$  membrane to prepare the sample for HPLC analysis on Waters 600 with a C18 reverse-phase column (4.6 mm  $\times$  250 mm, Kromasil) and 2998 photodiode array detector. The flow rate, column temperature, injection volume and detection wavelength were 0.8 mL/min, 35  $^\circ\text{C}$ , 20  $\mu\text{L}$  *resp.* 238 nm. The mobile phase consisted of 60% methanol, and 40% water contained 0.05% trifluoroacetic acid (TFA).

### 3. Characterization

The crystalline phase of the  $\text{InVO}_4$  materials was analyzed by X-ray diffraction (XRD, Ultima IV, Rigaku Co, Japan) with  $\text{CuK}\alpha$  irradiation ( $\lambda = 0.15406 \text{ nm}$ ) using a scanning speed of  $6^\circ/\text{min}$  in

the  $2\theta$  range of  $10 \sim 70^\circ$ , and corresponding crystal structures were drawn by Mercury software. The samples' morphology were examined by scanning electron microscopy (SEM, JSM-7500F, JEOL, Japan). The HRTEM analysis was conducted on a JEM-F200 (JEOL, Japan), and the acceleration voltage was set as 200 kV. The morphology change of the sample during the preparation process was monitored by an optical microscope (CX41, China) made by Olympus, Shanghai Lance Electronic Technology Co., Ltd. The specific surface areas and pore size distribution of the catalysts were derived from nitrogen adsorption isotherms measured on an adsorption/desorptometer (JW-BK112, JWGB, China) at 77 K using BET and BJH methods, respectively.

#### **4. Photocurrent and light absorption properties of InVO<sub>4</sub>**

The photocurrent measurements were performed on an electrochemical workstation (RDE710, GAMRY) with NaSO<sub>4</sub> aqueous solution (0.2 M) as the electrolyte. A xenon lamp (300 W) with two filters ( $\lambda < 420$  nm,  $\lambda > 760$  nm) was used as the light source and the Pt foil and saturated Ag/AgCl were used as counter and reference electrode. The working electrode were prepared by 5 mg of photocatalysts, 0.05 mL of Nafion dispersion and the resulted slurry products were coated on the  $1.0 \times 1.0$  cm conductive glass sheets and dried at  $60^\circ\text{C}$  for 2 h. The electrochemical impedance spectroscopy (EIS) measurement was used Pt foil and saturated Ag/AgCl as counter and reference electrode in 0.1 M K<sub>4</sub>FeC<sub>6</sub>N<sub>6</sub> electrolyte. For the preparation of a working electrode, 10 mg of photocatalysts were added to 1 mg carboxymethyl cellulose sodium and 2 mL ethyl alcohol and the resulted slurry products were coated on  $1.0 \times 1.0$  cm conductive glass sheets and dried at  $60^\circ\text{C}$  for 2 h (CHI 660E, Chenhua, China). The UV-vis diffuse reflectance spectroscopy

(UV-vis DRS) was determined using Shimadzu UV-3100 spectrophotometer with BaSO<sub>4</sub> as a reflectance standard. The bandgap is estimated based on the Kubelka-Munk equation (Eq. (1)) as:

$$\alpha h\nu = A (h\nu - E_g)^{n/2} \quad (1)$$

where  $\alpha$ ,  $h\nu$ ,  $A$  and  $E_g$  represent the absorption coefficient, photonic energy, constant, and bandgap value, respectively.

For the recycling experiments, the residual reaction was aged overnight and filtered. The filtered catalyst washed with water and absolute ethyl alcohol for three times, respectively. Then put the dried used photocatalysis into the 50 mL RhB solution ( $1.5 \times 10^{-5}$  M) and a new H<sub>2</sub>O<sub>2</sub> solution were added.

## **5. Identification of surface defects of InVO<sub>4</sub>**

The characteristics of surface defects were analyzed on a fluorescence spectrophotometer (HITACHI F-4500, Japan) with an excitation wavelength of 325 nm at room temperature. The analysis of valance state was carried out with X-ray photoelectron spectroscopy (XPS) conducted on a VG ESCALA-B220i-XL (Thermo Scientific, UK) with an Al K $\alpha$  X-ray source at a residual gas pressure below 10<sup>-8</sup> Pa. All binding energies of the elements examined were calibrated according to the C1s peak at 284.6 eV, which was assigned to the adventitious carbon.

## **6. H<sub>2</sub>O<sub>2</sub> activation by InVO<sub>4</sub> photocatalysts**

### **6.1 Decomposition rate of H<sub>2</sub>O<sub>2</sub>**

The concentration of H<sub>2</sub>O<sub>2</sub> was analyzed using the titanium (IV) sulphate method: to the filtered sample (60  $\mu$ L), a mixture (1 mL) of sulfuric acid (H<sub>2</sub>SO<sub>4</sub>, 3 M) and titanium sulphate (Ti(SO<sub>4</sub>)<sub>2</sub>,

0.05 M) was added, and the absorbance at 405 nm was determined using a UV-vis spectrometer (Perkin Elmer, USA).

## **6.2 Measurement of reactive species**

Firstly, the radical trapping experiment was conducted to identify the active species in the photodegradation over a photocatalyst. Isopropanol (IPA, 1 M), p-benzoquinone (1 M) and ethylenediaminetetraacetic acid (EDTA) was added as a scavenger for  $\bullet\text{OH}$ ,  $\text{O}_2\bullet^-$  and metal ions, respectively. The electron spin resonance (ESR) was obtained on a Bruker ER200-SRC spectrometer (Bruker, Germany). DMPO was used as a trapping agent for  $\bullet\text{OH}$  in water and  $\text{O}_2\bullet^-$  in methanol. The laser was Nd:YAG with 532 nm. The intensity of the central magnetic field was 3486.7 G.

## **7. Adjusted surface defects by surfactants**

### **7.1 In situ observation of the preparation process**

An optical microscope (CX41, China, manufactured by Olympus, Shanghai Lance Electronic Technology Co., Ltd.) was used to monitor the morphology changes during the preparation process.

### **7.2 Exposed crystal plane analysis**

An optical microscope (CX41, China, manufactured by Olympus, Shanghai Lance Electronic Technology Co., Ltd.) was used to monitor the morphology changes during the preparation process.

## 8. Physical characterization of nanocatalysts (Fig S1-S11 and Table S1-S4)

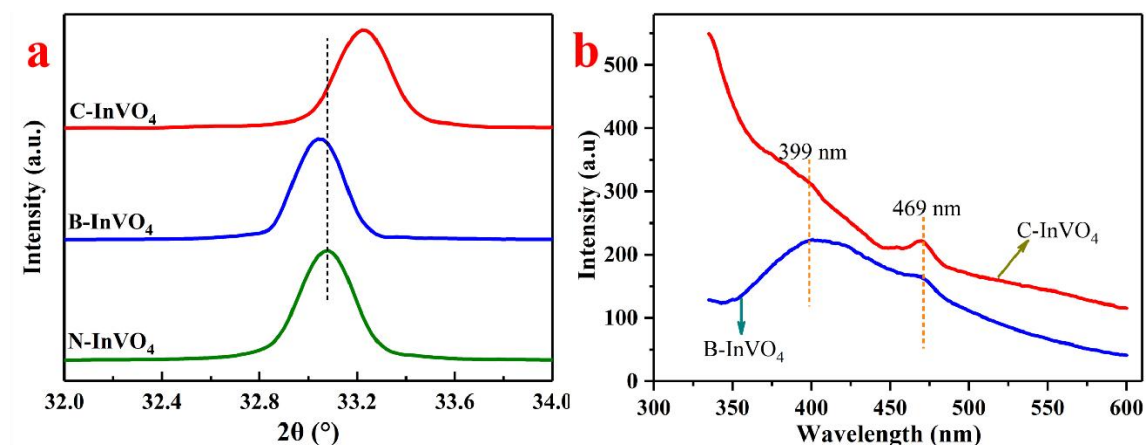

**Fig. S1.** (a) Enlarged XRD patterns of InVO<sub>4</sub> at the diffraction peaks of 33.05° and (b) PL spectra of as-prepared C-InVO<sub>4</sub> and B-InVO<sub>4</sub> samples with excitation at 315 nm.

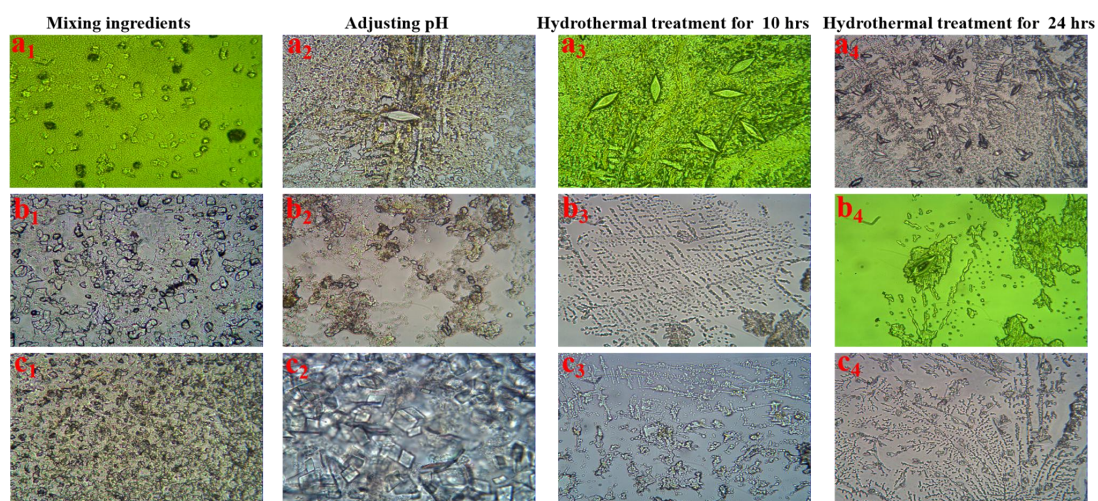

**Fig. S2.** Optical microscope map of the process preparation of InVO<sub>4</sub>: (a<sub>1</sub>-a<sub>4</sub>) N-InVO<sub>4</sub>, (b<sub>1</sub>-b<sub>4</sub>) C-InVO<sub>4</sub>, (c<sub>1</sub>-c<sub>4</sub>) B-InVO<sub>4</sub>. [four preparing process: mixing ingredients (1), adjusting pH (2), hydrothermal treatment for 10 hrs (3) and 24 hrs (4), respectively].

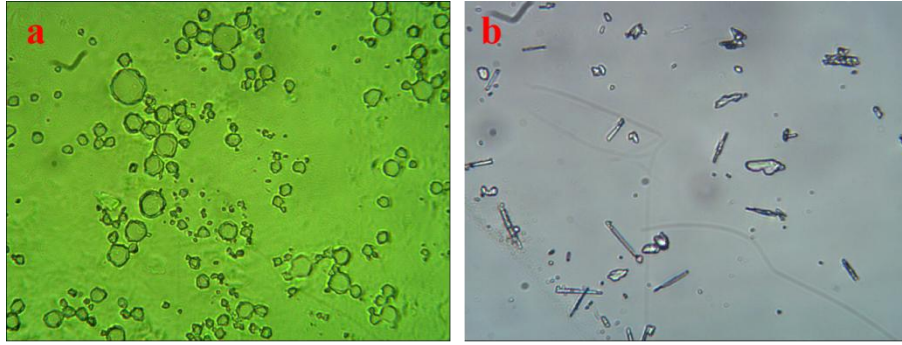

**Fig. S3.** (a) Optical microscope map of the suspension of CTAC and (b) CPB.

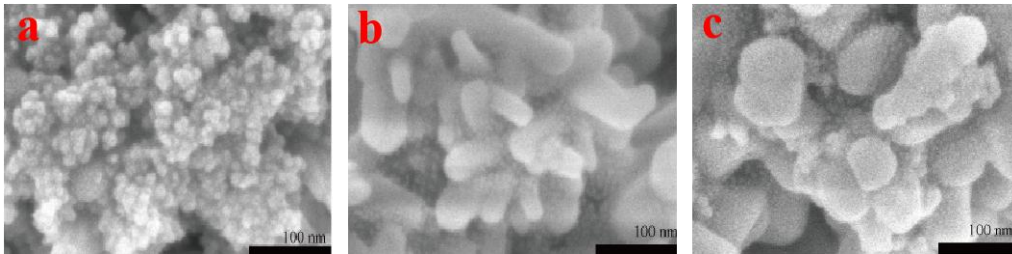

**Fig. S4.** SEM images of (a) C-InVO<sub>4</sub>, (b) B-InVO<sub>4</sub>, (c) N-InVO<sub>4</sub>

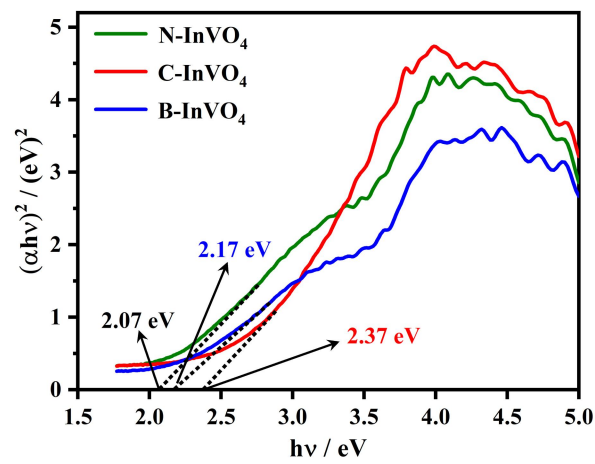

**Fig. S5.** The relationship of  $(\alpha h\nu)^{n/2}$  and  $h\nu$ .



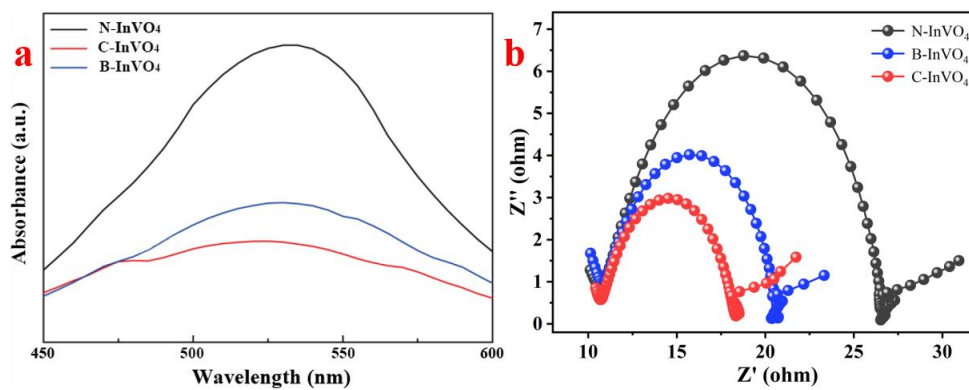

**Fig. S6.** (a) PL spectra and (b) EIS Nyquist plots of different InVO<sub>4</sub> samples.

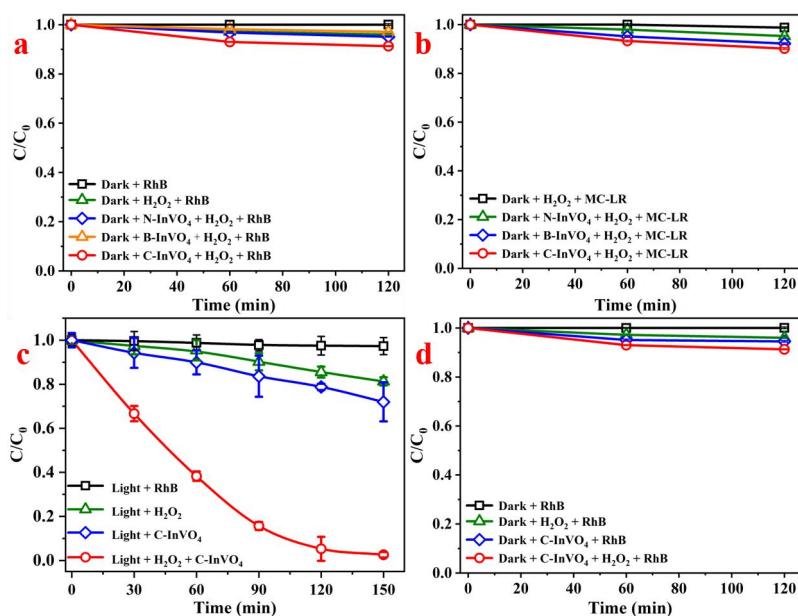

**Fig. S7.** The degradation curve of (a) RhB ( $1.5 \times 10^{-5}$  M) and (b) MC-LR ( $5 \times 10^{-6}$  M) using different InVO<sub>4</sub>/H<sub>2</sub>O<sub>2</sub> systems in dark; The degradation curve of RhB ( $1.5 \times 10^{-5}$  M) using C-InVO<sub>4</sub>/ H<sub>2</sub>O<sub>2</sub> (c) under visible and (d) in dark. Both conditions: [catal]=0.4 g/L, [H<sub>2</sub>O<sub>2</sub>] = 0.045 M, T= 35.5°C, pH = 5.93

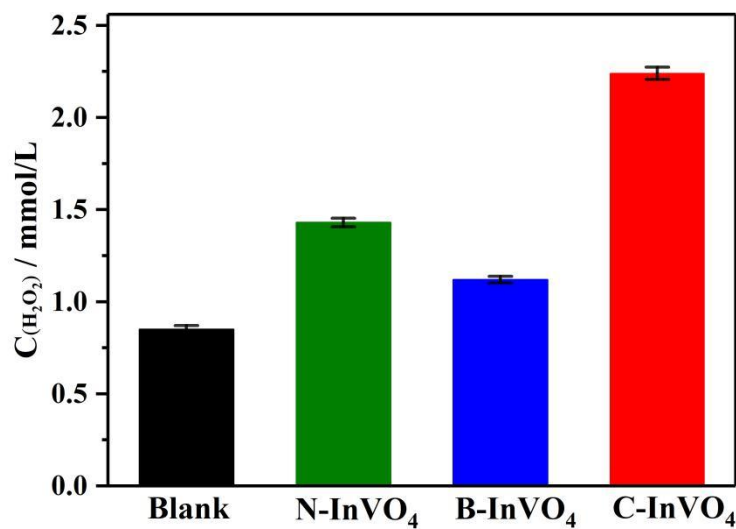

**Fig. S8.** The total quantity of H<sub>2</sub>O<sub>2</sub> decomposed in the 150-minute degradation process

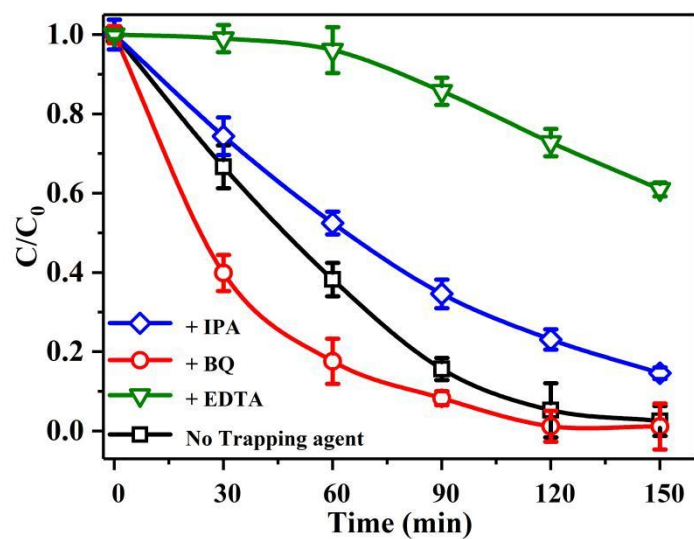

**Fig. S9.** The radical trapping experiments for RhB solution photocdegradation by C-InVO<sub>4</sub>/H<sub>2</sub>O<sub>2</sub>.

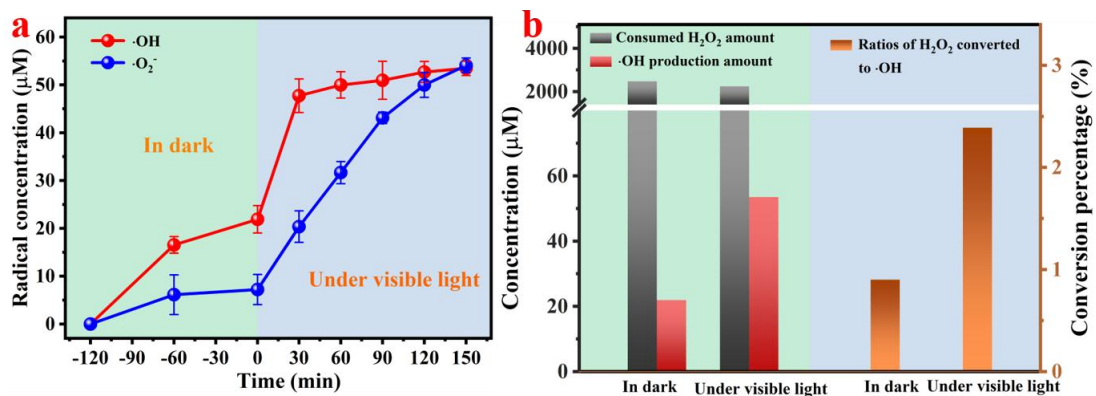

**Fig. S10.** (a)  $\cdot\text{OH}$  and  $\cdot\text{O}_2^-$  production and (b) the conversion percentage of  $\text{H}_2\text{O}_2$  to  $\cdot\text{OH}$  in the C-InVO<sub>4</sub> photo-Fenton reaction.

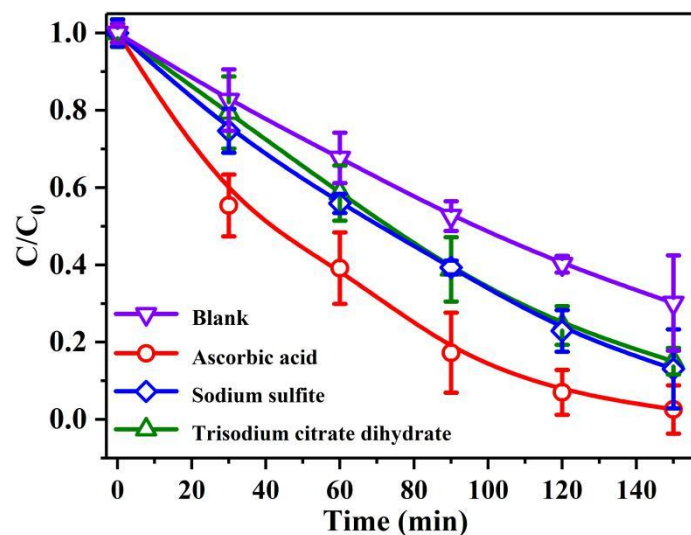

**Fig. S11.** The photodegradation of RhB solutions with the addition of different reductant by C-InVO<sub>4</sub> [catal]=0.4 g/L, [RhB]= $1.5 \times 10^{-5}$  M, T=35.5 °C; [ $\text{H}_2\text{O}_2$ ] = 0.045 M

**Table S1** The percentage of V 2p<sub>3/2</sub> and O1s of the fresh InVO<sub>4</sub> photocatalysts

| Sample              | V <sup>4+</sup> /V 2p <sub>3/2</sub> | O1/O1s | O2 /O1s | O3 /O1s |
|---------------------|--------------------------------------|--------|---------|---------|
| C-InVO <sub>4</sub> | 18.3%                                | 38.53% | 36.0%   | 25.47%  |
| B-InVO <sub>4</sub> | 12.57%                               | 14.56% | 45.0%   | 40.44%  |
| N-InVO <sub>4</sub> | 9.49%                                | 88.55% | 7.54%   | 3.91%   |

**Table S2.** Surface areas, pore diameters, pore volumes and particle size of InVO<sub>4</sub> samples.

| Sample              | Surface area (m <sup>2</sup> /g) | Pore diameter (nm) | Pore volume (cm <sup>3</sup> /g) |
|---------------------|----------------------------------|--------------------|----------------------------------|
| C-InVO <sub>4</sub> | 23.08                            | 14.59              | 0.084                            |
| B-InVO <sub>4</sub> | 10.95                            | 7.02               | 0.019                            |
| N-InVO <sub>4</sub> | 3.91                             | 8.40               | 0.008                            |

**Table S3.** Comparison of the catalytic activity of InVO<sub>4</sub> with other reported catalysts for photo-Fenton reaction.

| No. | Targeted pollutant            | Catalyst                                                                      | Oxidant                                     | Degradation efficiency | Time (min)                              | Ref.                  |
|-----|-------------------------------|-------------------------------------------------------------------------------|---------------------------------------------|------------------------|-----------------------------------------|-----------------------|
| 1   | RhB<br>(5×10 <sup>-5</sup> M) | InVO <sub>4</sub><br>(0.4 g/L)                                                | H <sub>2</sub> O <sub>2</sub><br>(0.045 mM) | 100%                   | 150 min<br>(Visible light)              | This work             |
| 2   | Methylene blue<br>(20 mg/L)   | Zn <sub>1-x</sub> Dy <sub>x</sub> Fe <sub>2</sub> O <sub>4</sub><br>(1.0 g/L) | H <sub>2</sub> O <sub>2</sub><br>(2 M)      | 97.5%                  | 45 min<br>(Visible light)               | Vinoshia et al., 2022 |
| 3   | Methylene blue<br>(20 mg/L)   | α-Fe <sub>2</sub> O <sub>3</sub> @diatomite<br>(0.1 g/L)                      | H <sub>2</sub> O <sub>2</sub><br>(90 mM)    | 98.0%                  | 4 h<br>(UV irradiation)                 | He et al., 2018       |
| 4   | Acetaminophen<br>(5 mg/L)     | CuS/MIL-Fe<br>(0.2 g/L)                                                       | H <sub>2</sub> O <sub>2</sub><br>(15 mM)    | 100%                   | 30 min (Simulated<br>solar irradiation) | Fang et al., 2023     |

|    |                                                 |                                                                                          |                                             |        |                             |                        |
|----|-------------------------------------------------|------------------------------------------------------------------------------------------|---------------------------------------------|--------|-----------------------------|------------------------|
| 5  | 2, 4-dimethyl phenol<br>( $5 \times 10^{-5}$ M) | CuO/g-C <sub>3</sub> N <sub>4</sub><br>(0.5 g/L)                                         | H <sub>2</sub> O <sub>2</sub><br>(0.1 mM)   | 99.0%  | 160 min<br>(Visible light)  | Sharma et al., 2020    |
| 6  | Benzoic acid<br>12 mg/L                         | Fe <sup>III</sup> Cu <sup>I</sup> @SiO <sub>2</sub><br>(2 g/L)                           | H <sub>2</sub> O <sub>2</sub><br>(0.17 M)   | 89.0 % | 180 min<br>(Blue light)     | Pratiwi et al., 2021   |
| 7  | RhB<br>15 mg/L                                  | Fe <sub>2</sub> O <sub>3</sub> /reduced graphene oxide aerogel (0.08 g/L)                | H <sub>2</sub> O <sub>2</sub><br>(1.0mM)    | 100%   | 120 min<br>(UV irradiation) | Feng et al., 2018      |
| 8  | Methylene blue<br>(20 mg/L)                     | CuS-functionalized cellulose based aerogel (0.75 g/L)                                    | H <sub>2</sub> O <sub>2</sub><br>(/)        | 97.6%  | 90 min<br>(Visible light)   | Saeed et al., 2019     |
| 9  | Antibiotic cefotaxime<br>(0.4 mM)               | Ferrihydrite/TiO <sub>2</sub><br>(0.2 g/L)                                               | H <sub>2</sub> O <sub>2</sub><br>(10 mM)    | 99.2%  | 30 min<br>(UV irradiation)  | Jiang et al., 2021     |
| 10 | Crystal violet dye<br>10 mg/L                   | Gd <sub>2</sub> Zr <sub>2</sub> O <sub>7</sub><br>(0.5 g/L)                              | H <sub>2</sub> O <sub>2</sub><br>(0.2 M)    | 90.0%  | 60 min<br>(UV irradiation)  | Abdelbaky et al., 2023 |
| 11 | Methylene blue<br>(10 mg/L)                     | Fe <sub>2</sub> O <sub>3</sub> ·CuO·MnO <sub>x</sub> ·MCM-41 mesoporous silica (1.0 g/L) | H <sub>2</sub> O <sub>2</sub><br>(0.045 mM) | 99.6%  | 45 min<br>(UV irradiation)  | Sun et al., 2020       |
| 12 | Dye RB19<br>0.075 g/L                           | Magnetite<br>(1.0 g/L)                                                                   | H <sub>2</sub> O <sub>2</sub><br>(100 mM)   | 78.0%  | 60 min                      | Tavares et al., 2022   |

P. Annie Vinosha, J.V. Annie Vinsla, J. Madhavan, Sandhanasamy Devanesan, Mohamad S. AlSalhi, Marcello Nicoletti, Belina Xavier, Impact of dysprosium doped (Dy) zinc ferrite (ZnFe<sub>2</sub>O<sub>4</sub>) nanocrystals in photo-fenton exclusion of recalcitrant organic pollutant. 2022, *Environmental Research*, 2022, 203, 111913.

Yi He, De Bin Jiang, De Yi Jiang, Jie Chen, Yu Xin Zhang, Evaluation of MnO<sub>2</sub>-templated iron oxide-coated diatomites for their catalytic performance in heterogeneous photo Fenton-like system. *Journal of Hazardous Materials*, 2018, 344, 230-240.

Zhimo Fang, Yibo Liu, Juanjuan Qi, Zhong-Fei Xu, Tiejue Qi, Lidong Wang, Establishing a high-speed electron transfer channel via CuS/MIL-Fe heterojunction catalyst for photo-Fenton degradation of acetaminophen. *Applied Catalysis B: Environmental*, 2023, 320, 121979.

Kirti Sharma, Pankaj Raizada, Ahmad Hosseini-Bandegharaci, Pankaj Thakur, Rajesh Kumar, Vijay Kumar Thakur, Van-Huy Nguyen, Pardeep Singh, Fabrication of efficient CuO/graphitic carbon nitride based heterogeneous photo-Fenton like catalyst for degradation of 2, 4 dimethyl phenol. *Process Safety and Environmental Protection*, 2020, 143, 63-75.

Jesslyn Pratiwi, Jui-Yen Lin, Nicolaus N.N Mahasti, Yu-Jen Shih, Yao-Hui Huang, Fluidized-bed synthesis of iron-copper bimetallic catalyst (Fe<sup>III</sup>Cu<sup>I</sup>@SiO<sub>2</sub>) for mineralization of benzoic acid in blue light-assisted Fenton process. *Journal of the Taiwan Institute of Chemical Engineers*, 2021, 119, 60-69.

Yan Feng, Tongjie Yao, Yang Yang, Furen Zheng, Peng Chen, Jie Wu, Baifu Xin, One-step preparation of Fe<sub>2</sub>O<sub>3</sub>/reduced graphene oxide aerogel as heterogeneous Fenton-like catalyst for enhanced photo-degradation of

organic dyes. *ChemistrySelect*, 2018, 3, 9062 -9070.

Rana Muhammad Yousaf Saeed, Zahira Bano, Jianzhong Sun, Fengyun Wang, Nabi Ullah, Qianqian Wang, CuS-functionalized cellulose based aerogel as biocatalyst for removal of organic dye. *Journal of Applied Polymer Science*, 2019, 136, 47404.

Qi Jiang, Runliang Zhu, Yanping Zhua, and Qingze Chen, Efficient degradation of cefotaxime by a UV + ferrihydrite/TiO<sub>2</sub> + H<sub>2</sub>O<sub>2</sub> process: the important role of ferrihydrite in transferring photo-generated electrons from TiO<sub>2</sub> to H<sub>2</sub>O<sub>2</sub>, *Journal of Chemical Technology and Biotechnology*, 2019, 94, 2512-2521.

Tao Sun, Mingfu Gong, Yuanqing Cai, Shilin Xiao, Liang Zhang, Ya Zhang, Zhongsheng Xu, Dong Zhang, Yun Liu, Chunyu Zhou, MCM-41-supported Fe(Mn)/Cu bimetallic heterogeneous catalysis for enhanced and recyclable photo-Fenton degradation of methylene blue, *Research on Chemical Intermediates*, 2020, 46, 459-474.

Marcela G. Tavares, Jos'e Leandro da S. Duarte, Leonardo M.T.M. Oliveira, Eduardo J. S. Fonseca, Josealdo Tonholo, Adriana S. Ribeiro, Carmem L.P.S. Zanta. Reusable iron magnetic catalyst for organic pollutant removal by Adsorption, Fenton and Photo Fenton process, *Journal of Photochemistry & Photobiology, A: Chemistry*, 2022, 432, 114089.

**Table S4** The percentage of V 2p<sub>3/2</sub> for the samples of C-InVO<sub>4</sub> , B-InVO<sub>4</sub> and N-InVO<sub>4</sub> after degradation.

| Sample              | V <sup>4+</sup> /V 2p <sub>3/2</sub> | V <sup>5+</sup> /V 2p <sub>3/2</sub> |
|---------------------|--------------------------------------|--------------------------------------|
| C-InVO <sub>4</sub> | 5.7%                                 | 94.3%                                |
| B-InVO <sub>4</sub> | 8.19%                                | 91.81%                               |
| N-InVO <sub>4</sub> | 7.71%                                | 92.29%                               |
